# Supplementary material
Source: publisher site journal article supplement (https://www.dovepress.com/get_supplementary_file.php?f=238193.docx)

Appendix.

**1.** Identification of peritoneal metastases using variables in the Danish Colorectal Cancer Group (DCCG) database, Danish version of the International Classification (ICD-10)-codes in the Danish National Patient Registry (DNPR) and a combination of Danish Systematized Nomenclature of Medicine (SNOMED)-codes in the Danish National Pathology Registry (DNPatR)

| **DCCG** |
| --- |
| Metastases to the peritoneum |
| Perioperative finding of peritoneal metastases |
| Perioperative treatment with hyperthermic intraperitoneal chemotherapy (HIPEC) |
|  |

| **ICD-10 code in the DNPR** |
| --- |
| C786 (metastases to the retroperitoneal space or to the peritoneum) |
| C796 (metastases to the ovarium). |

| **SNOMED-codes in the DNPatR** | | |
| --- | --- | --- |
| Localization | Morphology | Origin |
| TY4400 (peritoneum)  TY4410 (peritoneal mesotel)  T64120 (serosa, small bowel)  T67090 (serosa, colon)  T68065 (serosa, rectum)  T74050 (serosa, urinary bladder)  T82500 (serosa, uterus)  T66020 (serosa, appendix)  T6X942 (cytology, peritoneal fluid)  T6X944 (cytology, peritoneal scrape)  T6x940 (cytology, peritoneum)  T63850 (omentum)  T63860 (greater omentum)  T63870 (lesser omentum)  T44300 (abdominal wall)  TY4220 (umbilicus)  TY4230 (umbilical region)  T18010 (ligament)  T18030 (hepatic falciform ligament)  T86300 (ligamentum latum)  T8630A (ligamentum latum, right)  T8630B (ligamenttum latum, left)  T86700 (ligamentum rotundum)  T8670A (ligamentum rotundum, right)  T8670B (ligamentum rotundum, left) | M81403 (adenokarcinom)  M81404  M81406  M81407  M81409  M84803 (mucinous adenocarcinoma)  M84804  M84806  M84807  M84809  M84903 (signet ring cell carcinoma)  M84904  M84906  M84907  M84809  M80103 (carcinoma)  M80104  M80106  M80107  M80109  M82313 (low differentiated adenocarcinoma)  M82314  M82316  M82317  M82319  M85743 (adenocarcinoma with neuroendocrine differentiation)  M85744  M85746  M85747  M85749  M814F3 (adenocarcinoma on the basis of immune profile)  M814F4  M814F6  M814F7  M814F9  M85103 (medullary carcinoma)  M85104  M85106  M85107  M85109  M84703 (mucinous cystadenocarcinoma)  M84704  M84706  M84707  M84709 | ÆF4450 colon/rectum |

2. The number of days from the colorectal cancer diagnosis (day 0) in the Danish Colorectal Cancer Groups database (DCCG) to the diagnosis of synchronous peritoneal metastases (S-PM) in the Danish National Patient Registry (DNPR) and/or the Danish National Pathology Registry (DNPatR). The boxes display the interquartile range and the median. The whiskers display the upper and lower values within 1.5 times the interquartile range.


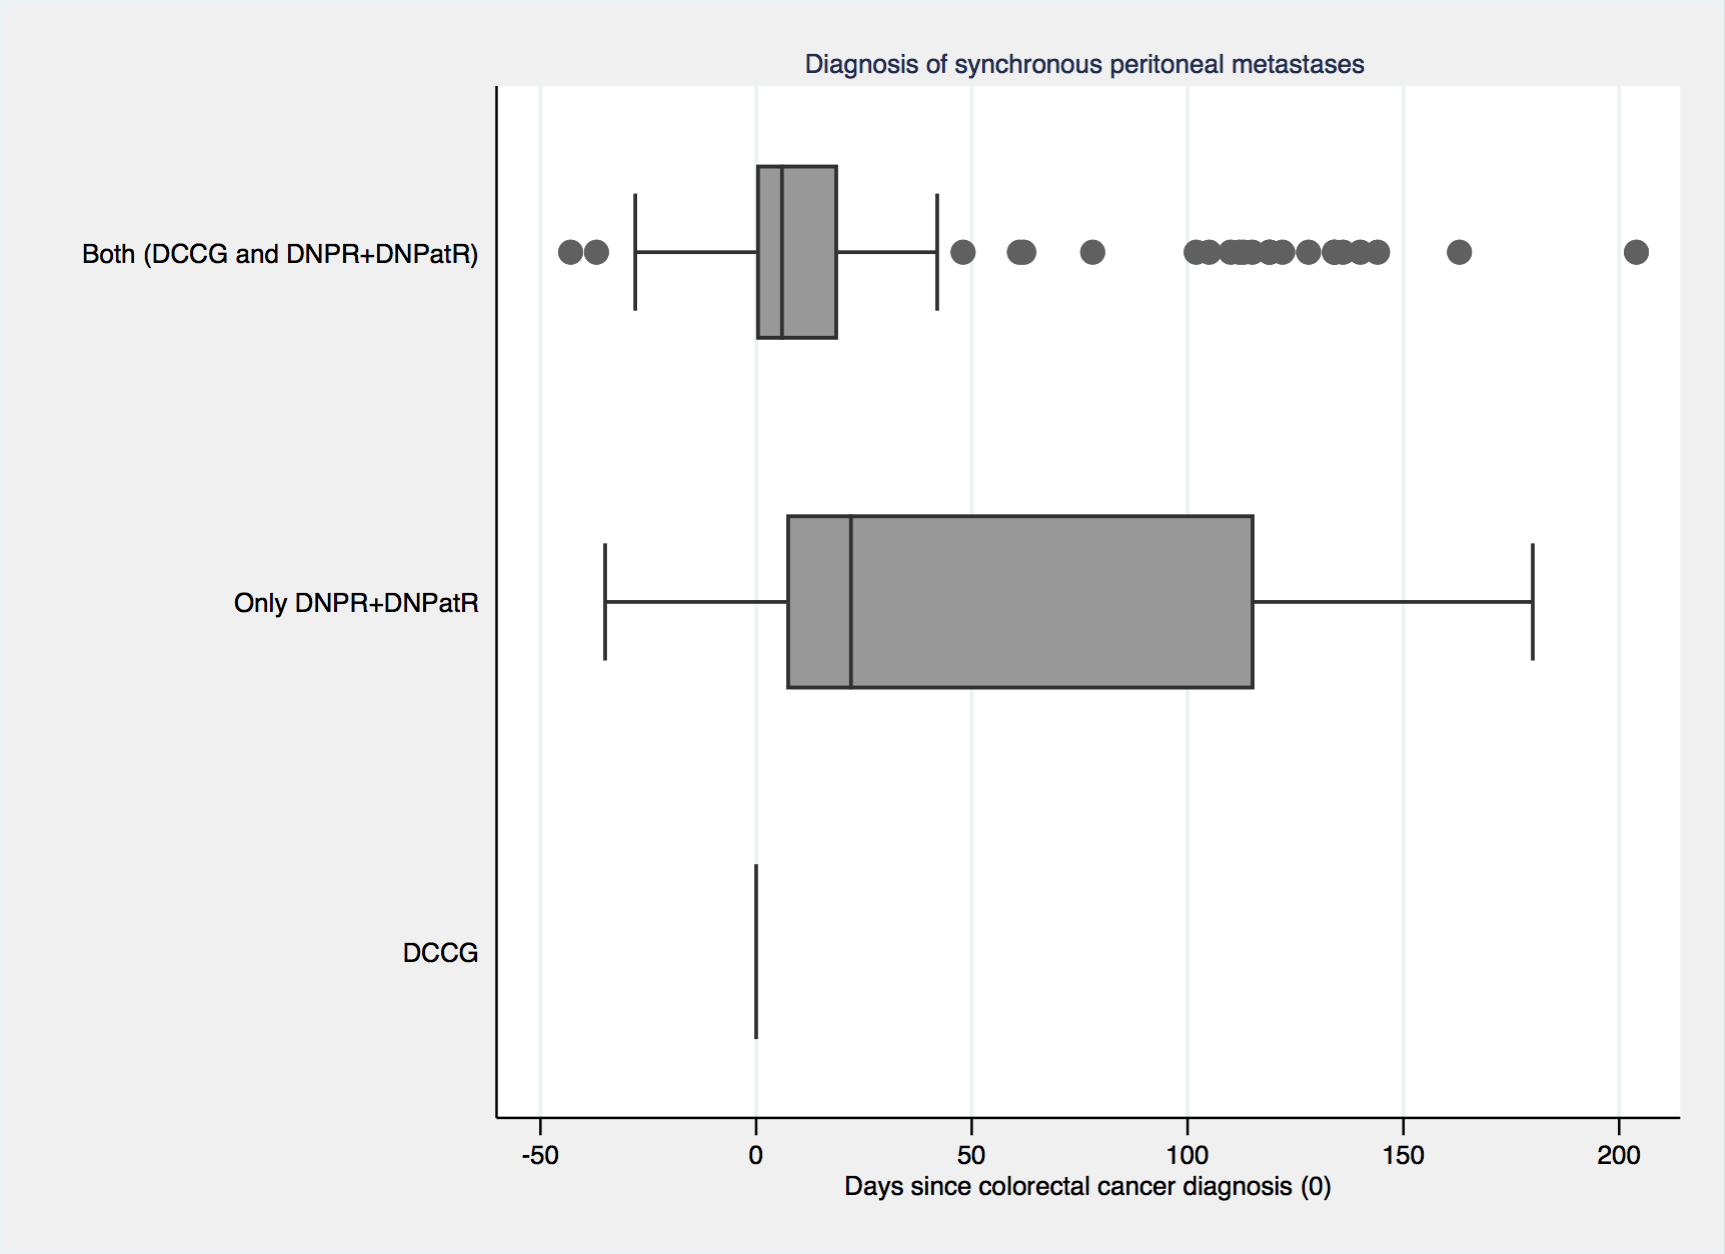

Supplement: Supplementary file 1 [file get_supplementary_file.php]
